# Supplementary material for: Development of a Metastatic Uveal Melanoma Prognostic Score (MUMPS) for Use in Patients Receiving Immune Checkpoint Inhibitors
Source: MDPI journal article supplement (doi:10.3390/cancers13143640), 2021-07-20
Supplement: s1 [file s1]

Supplementary

# Development of a Metastatic Uveal Melanoma Prognostic Score (MUMPS) for use in Patients Receiving Immune Checkpoint Inhibitors

Deirdre Kelly et. al.

**Table S1.** Treatment duration and discontinuation in the entire study cohort by treatment groups.

|                                                   | Anti-PD1<br>( <i>n</i> = 54) | Anti-PD1+anti-CTLA4<br>( <i>n</i> = 21) | <i>p</i> -value   |
|---------------------------------------------------|------------------------------|-----------------------------------------|-------------------|
| <b>Total # cycles Anti-PD1+anti-CTLA4</b>         |                              |                                         | -                 |
| 1                                                 | -                            | 1 (5%)                                  |                   |
| 2                                                 | -                            | 6 (29%)                                 |                   |
| 3                                                 | -                            | 7 (33%)                                 |                   |
| 4                                                 | -                            | 7 (33%)                                 |                   |
| <b>Maintenance/Monotherapy</b>                    |                              |                                         |                   |
| Anti-PD1                                          | 52 (96%)                     | 9 (43%)                                 | <i>p</i> < 0.0001 |
| Anti-PDL1                                         | 2 (4%)                       | 0 (0%)                                  |                   |
| No maintenance/monotherapy                        | -                            | 12 (57%)                                |                   |
| <b># cycles containing standard dose anti-PD1</b> |                              |                                         | <i>p</i> = 0.0079 |
| Average                                           | 7.2                          | 3.5                                     |                   |
| Median                                            | 4                            | 2                                       |                   |
| Range                                             | 1–38                         | 0–29                                    |                   |
| <b>Reason for discontinuation</b>                 |                              |                                         | <i>p</i> = 0.21   |
| Progression                                       | 46 (85%)                     | 15 (71%)                                |                   |
| Toxicity                                          | 5 (9%)                       | 4 (19%)                                 |                   |
| On-going treatment                                | 1 (2%)                       | 2 (9%)                                  |                   |
| Lost to follow-up                                 | 2 (4%)                       | 0 (0%)                                  |                   |

**Table S2.** Treatment and dosing schedule of combination anti-PD-1 + anti-CTLA4.

| Combinations                                                                         | Number of Patients<br><i>n</i> = 21 (%) |
|--------------------------------------------------------------------------------------|-----------------------------------------|
| anti-CTLA4 3 mg/kg + anti-PD1 1 mg/kg Q3W, followed by anti-PD1 3 mg/kg Q2W          | 17 (81%)                                |
| Anti-CTLA4 1 mg/kg + anti-PD1 2mg/kg or 200 mg Q3W, followed by anti-PD1 2 mg/kg Q3W | 2 (9.5%)                                |
| anti-CTLA4 1 mg/kg + anti-PD1 3 mg/kg Q3W, followed by anti-PD1 3 mg/kg Q2W          | 2 (9.5%)                                |

Abbreviations: Q2W = every 2 weeks; Q3W = every 3 weeks.

Table S3. Genomic analyses of mUM tumor specimens.

|                         | Entire cohort<br>(n = 75) | Anti-PD1<br>(n = 54) | Anti-PD1 +anti-CTLA4<br>(n = 21) | p-value |
|-------------------------|---------------------------|----------------------|----------------------------------|---------|
| <b>Impact Genetics</b>  |                           |                      |                                  | 0.128   |
| Yes                     | 16 (21%)                  | 9 (17%)              | 7 (33%)                          |         |
| No                      | 59 (79%)                  | 45 (63%)             | 14 (67%)                         |         |
| <b>NGS</b>              |                           |                      |                                  | 0.032   |
| Yes                     | 50 (67%)                  | 32 (59%)             | 18 (86%)                         |         |
| No                      | 25 (33%)                  | 22 (41%)             | 3 (14%)                          |         |
| <b>Impact Genetics</b>  |                           |                      |                                  |         |
| <b>Chromosome 1</b>     |                           |                      |                                  | 0.163   |
| 1p disomy               | 9 (12%)                   | 5 (9%)               | 4 (19%)                          |         |
| 1p borderline loss      | 3 (4%)                    | 1 (2%)               | 2 (10%)                          |         |
| 1p loss                 | 3 (4%)                    | 2 (4%)               | 1 (5%)                           |         |
| Not tested/insufficient | 60 (80%)                  | 46 (85%)             | 14 (67%)                         |         |
| <b>Chromosome 3</b>     |                           |                      |                                  | 0.170   |
| Monosomy 3              | 15 (20%)                  | 8 (15%)              | 7 (33%)                          |         |
| Partial Monosomy        | 1 (1%)                    | 1 (2%)               | 0 (0%)                           |         |
| Not tested/insufficient | 59 (79%)                  | 45 (83%)             | 14 (67%)                         |         |
| <b>Chromosome 6p</b>    |                           |                      |                                  | 0.049   |
| 6p disomy               | 12 (16%)                  | 5 (9%)               | 7 (33%)                          |         |
| 6p gain/borderline gain | 3 (4%)                    | 3 (6%)               | 0 (0%)                           |         |
| Not tested/insufficient | 60 (80%)                  | 46 (85%)             | 14 (67%)                         |         |
| <b>Chromosome 6q</b>    |                           |                      |                                  | 0.212   |
| 6q disomy               | 7 (9%)                    | 4 (7%)               | 3 (14%)                          |         |
| 6q borderline loss      | 2 (3%)                    | 1 (2%)               | 1 (5%)                           |         |
| 6q loss                 | 6 (8%)                    | 3 (6%)               | 3 (14%)                          |         |
| Not tested/insufficient | 60 (80%)                  | 46 (85%)             | 14 (67%)                         |         |
| <b>Chromosome 8p</b>    |                           |                      |                                  | 0.130   |
| 8p disomy               | 8 (11%)                   | 6 (11%)              | 2 (10%)                          |         |
| 8p borderline loss      | 3 (4%)                    | 1 (2%)               | 2 (10%)                          |         |
| 8p loss                 | 5 (7%)                    | 2 (4%)               | 3 (14%)                          |         |
| Not tested/insufficient | 59 (79%)                  | 45 (83%)             | 14 (67%)                         |         |
| <b>Chromosome 8q</b>    |                           |                      |                                  | 0.164   |
| 8q gain                 | 14 (19%)                  | 7 (13%)              | 7 (33%)                          |         |

|                         |          |          |          |
|-------------------------|----------|----------|----------|
| 8q partial gain         | 2 (3%)   | 2 (4%)   | 0        |
| Not tested/insufficient | 59 (79%) | 45 (83%) | 14 (67%) |
| <b>NGS Testing:</b>     |          |          |          |
| <b>BRAF</b>             |          |          | 0.106    |
| BRAF WT                 | 49 (65%) | 32 (59%) | 17 (81%) |
| BRAF mutated            | 0        | 0        | 0        |
| Not tested/insufficient | 26 (33%) | 22 (41%) | 4 (19%)  |
| <b>NRAS</b>             |          |          | 0.119    |
| NRAS WT                 | 46 (61%) | 30 (56%) | 16 (76%) |
| NRAS mutated            | 0        | 0        | 0        |
| Not tested/insufficient | 29 (39%) | 24 (44%) | 5 (24%)  |
| <b>GNA11</b>            |          |          | 0.088    |
| GNA11 209               | 15 (20%) | 11 (20%) | 4 (19%)  |
| GNA11 183               | 2 (3%)   | 2 (4%)   | 0        |
| GNA11 WT                | 27 (36%) | 15 (28%) | 12 (57%) |
| Not tested/insufficient | 31 (41%) | 26 (48%) | 5 (24%)  |
| <b>GNAQ</b>             |          |          | 0.024    |
| GNAQ 209                | 21 (28%) | 10 (19%) | 11 (52%) |
| GNAQ 183                | 1 (1%)   | 1 (2%)   | 0        |
| GNAQ WT                 | 22 (29%) | 17 (31%) | 5 (24%)  |
| Not tested/insufficient | 31 (41%) | 26 (48%) | 5 (24%)  |
| <b>BAP1</b>             |          |          | 0.003    |
| BAP1 mutated            | 19 (25%) | 8 (15%)  | 11 (54%) |
| BAP1 WT                 | 20 (27%) | 15 (28%) | 5 (24%)  |
| Not tested/insufficient | 36 (48%) | 31 (57%) | 5 (24%)  |
| <b>SF3B1</b>            |          |          | 0.062    |
| SF3B1 mutated           | 6 (8%)   | 4 (7%)   | 2 (10%)  |
| SF3B1 WT                | 32 (43%) | 19 (35%) | 13 (62%) |
| Not tested/insufficient | 37 (49%) | 31 (57%) | 6 (28%)  |

**Table S4.** Number of patients who received anti-PD1/L1 monotherapy or anti-PD1/L1 + anti-CTLA4 antibodies.

| Treatment             | MUMPS good risk<br>(score = 3) | MUMPS intermediate<br>risk<br>(score = 2) | MUMPS poor risk<br>(score = 0 or 1) | <i>p</i> -value  |
|-----------------------|--------------------------------|-------------------------------------------|-------------------------------------|------------------|
| Anti-PD1 monotherapy  | 17                             | 28                                        | 9                                   | <i>p</i> = 0.522 |
| Anti-PD1 + anti-CTLA4 | 5                              | 10                                        | 6                                   |                  |

**Table S5.** Open Interventional Clinical Trials for the treatment of Metastatic Uveal Melanoma (Current as of 24 January 2021) [1].

| Clinical Trial ID | Intervention                                                                                                                           | Phase | Size <sup>a</sup> | First Posted |
|-------------------|----------------------------------------------------------------------------------------------------------------------------------------|-------|-------------------|--------------|
| NCT04589832       | Procaspase-Activating Compound 1 (PAC-1) in combination with Entrectinib (NTRK Inhibitor)                                              | 1b/2  | 38                | Oct 2020     |
| NCT04552223       | Nivolumab and Relatlimab (LAG-3 Abtibody)                                                                                              | 2     | 27                | Sept 2020    |
| NCT04551352       | O7293583, A Tyrosinase-Related Protein 1 (TYRP 1) - Targeting CD3 T-Cell Engager                                                       | 1     | 310               | Sept 2020    |
| NCT04335890       | Vaccination with Inhibitor Of Nuclear Factor Kappa B Kinase Subunit Beta (IKKb) matured Dendritic Cells                                | 1     | 12                | April 2020   |
| NCT04283890       | Percutaneous hepatic perfusion with Ipilimumab and Nivolumab                                                                           | 1/2   | 88                | Feb 2020     |
| NCT04109456       | IN10018, a Focal Adhesion Kinase (FAK) Inhibitor +/- Cobimetinib                                                                       | 1b    | 52                | Sept 2019    |
| NCT03947385       | IDE196, a PKC inhibitor +/- Binimetinib in patients with solid tumors harboring GNAQ or GNAQ/11 mutations or PRKC fusions              | 1/2   | 217               | May 2019     |
| NCT03865212       | Intravenous Injection of Vesicular Stomatitis Virus Expressing Human Interferon Beta and Tyrosinase Related Protein 1 (VSV-IFNb-TYRP1) | 1     | 71                | Mar 2019     |
| NCT03467516       | Tumor Infiltrating Lymphocytes                                                                                                         | 2     | 59                | Mar 2018     |
| NCT03472586       | Immunoembolization in combination with ipilimumab and nivolumab                                                                        | 2     | 35                | Mar 2018     |
| NCT03025256       | Intrathecal nivolumab in combination with intravenous Nivolumab in treating patients with leptomeningeal disease                       | 1     | 50                | Jan 2017     |
| NCT03068624       | Cyclophosphamide, autologous CD8+ SLC45A2-specific T lymphocytes via hepatic arterial infusion and ipilimumab                          | 1b    | 30                | Mar 2017     |

<sup>a</sup> Participant size as stated in registry entry.

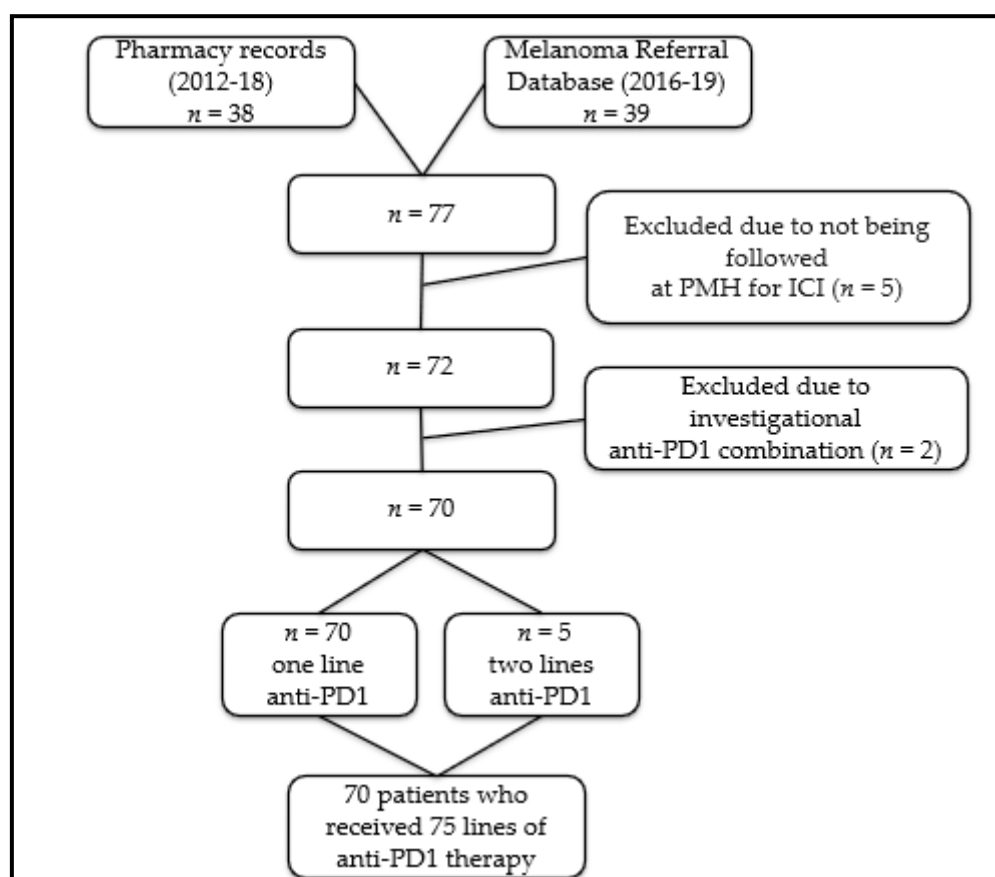

**Figure S1.** Consort diagram. We identified 77 patients who had received anti-PD1/L1 containing therapy for metastatic uveal melanoma. Two patients were excluded due to non-uveal histology (blue nevus and conjunctival). Two patients were excluded who had received anti-PD1/L1 therapy combined with investigational agents (ie. not anti-CTLA4). Finally, we excluded who were not followed at PM-UHN during their ICI treatment. After exclusion of these patients, the remaining 70 individual patients included 5 patients who had 2 lines of anti-PD1 ICI treatment. We analyzed data from 70 patients who had received a total of 75 lines of anti-PD1 ICI therapy.

## References

1. NIH, *Recruiting Studies ; Uveal Melanoma, Metastatic* NIH U.S. National Library of Medicine Clinical Trials.gov URL [https://clinicaltrials.gov/ct2/results?cond=Uveal+Melanoma%2C+Metastatic&Search=Apply&recrs=a&age\\_v=&gndr=&type=&rslt=](https://clinicaltrials.gov/ct2/results?cond=Uveal+Melanoma%2C+Metastatic&Search=Apply&recrs=a&age_v=&gndr=&type=&rslt=) (Accessed 24 January 2021) 2021.
